# Supplementary material for: Diagnostic Potential of the Plasma Lipidome in Infectious Disease: Application to Acute SARS-CoV-2 Infection
Source: MDPI journal article supplement (doi:10.3390/metabo11070467), 2021-07-20
Supplement: s1 [file s1]

## *Supplementary Data*

### Diagnostic Potential of the Plasma Lipidome in Infectious Disease: Application to Acute SARS-CoV-2 Infection

Nicola Gray<sup>1,2</sup>, Nathan G. Lawler<sup>1,2</sup>, Annie Xu Zeng<sup>1</sup>, Monique Ryan<sup>1</sup>, Sze How Bong<sup>1</sup>, Berin A. Boughton<sup>1,2</sup>, Maider Bizkarguenaga<sup>5</sup>, Chiara Bruzzzone<sup>5</sup>, Nieves Embade<sup>5</sup>, Julien Wist<sup>1,3</sup>, Elaine Holmes<sup>1,2,4</sup>, Oscar Millet<sup>5\*</sup>, Jeremy K. Nicholson<sup>1,2,6\*</sup>, Luke Whiley<sup>2,7\*</sup>

<sup>1</sup> Australian National Phenome Centre, Health Futures Institute, Murdoch University, Harry Perkins Institute, 5 Robin Warren Drive, Perth, Western Australia 6150, Australia

<sup>2</sup> Centre for Computational and Systems Medicine, Health Futures Institute, Murdoch University, Harry Perkins Institute, 5 Robin Warren Drive, Perth, Western Australia 6150, Australia

<sup>3</sup> Chemistry Department, Universidad del Valle, 76001 Cali, Colombia

<sup>4</sup> Department of Metabolism Digestion and Reproduction, Faculty of Medicine, Imperial College London, Sir Alexander Fleming Building, South Kensington, London SW7 2AZ, U.K.

<sup>5</sup> Precision Medicine and Metabolism Laboratory, CIC bioGUNE, Basque Research and Technology Alliance, Bizkaia Science and Technology Park, building 800, 48160 Derio, Bizkaia, Spain

<sup>6</sup> Institute of Global Health Innovation, Imperial College London, Level 1, Faculty Building South Kensington Campus, London SW7 2AZ, U.K.

<sup>7</sup> Perron Institute for Neurological and Translational Science, Nedlands, Western Australia 6009, Australia

\* Correspondence to [luke.whiley@murdoch.edu.au](mailto:luke.whiley@murdoch.edu.au), [Jeremy.nicholson@murdoch.edu.au](mailto:Jeremy.nicholson@murdoch.edu.au), [j.nicholson@imperial.ac.uk](mailto:j.nicholson@imperial.ac.uk) and [omillet@cicbiogune.es](mailto:omillet@cicbiogune.es)

## Supplementary methods

### Quantitative LC-MS/MS analysis

The analytical system comprised an ExionLC™ coupled to a QTRAP 6500+ system (Sciex, MA, USA). Reversed-phase separation was performed using an Acquity BEH C18 1.7  $\mu$ m, 2.1 x 100 mm column (Waters Corp., MA, USA) at 60 °C. Mobile phase A was water/acetonitrile/propan-2-ol (50/30/20, v/v/v) containing 10 mM ammonium acetate and mobile phase B was propan-2-ol/acetonitrile/water (90/9/1, v/v/v) containing 10 mM ammonium acetate. The flow rate was 0.4 mL/min with gradient elution starting at 10 % B, increasing to 45 % B at 2.7 min, 53 % at 2.8 min, 60% B at 8.0 min, 80 % B at 8.1 min and holding at 80 % B until 11.5 min, 100 % B at 12.0 min for 1 min before returning to 10 % B for a 2 min re-equilibration for a total cycle time of 15 min. The injection volume was 5  $\mu$ L.

A Sciex QTRAP 6500+ was operated with electrospray ionisation using polarity switching. The following mass spectrometer settings were used; capillary voltage, 5500 V (positive ion mode) and -4500 V (negative ion mode); temperature, 300 °C; curtain gas, 20 psi; ion source gas 1, 40 psi; ion source gas 2, 60 psi. Time-scheduled multiple reaction monitoring (MRM) was used for data acquisition. Data was acquired using Analyst® 1.7.1.

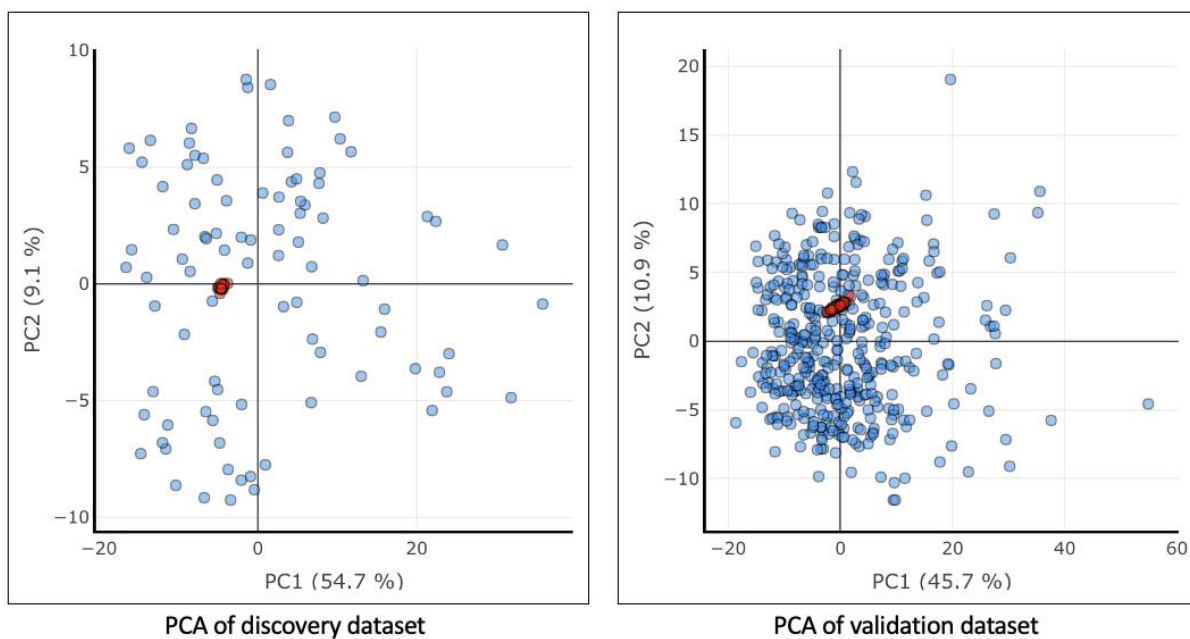

**Figure S1.** Principal component analysis of the discovery and validation datasets. Pooled QC samples are highlighted in red, with study samples in blue.

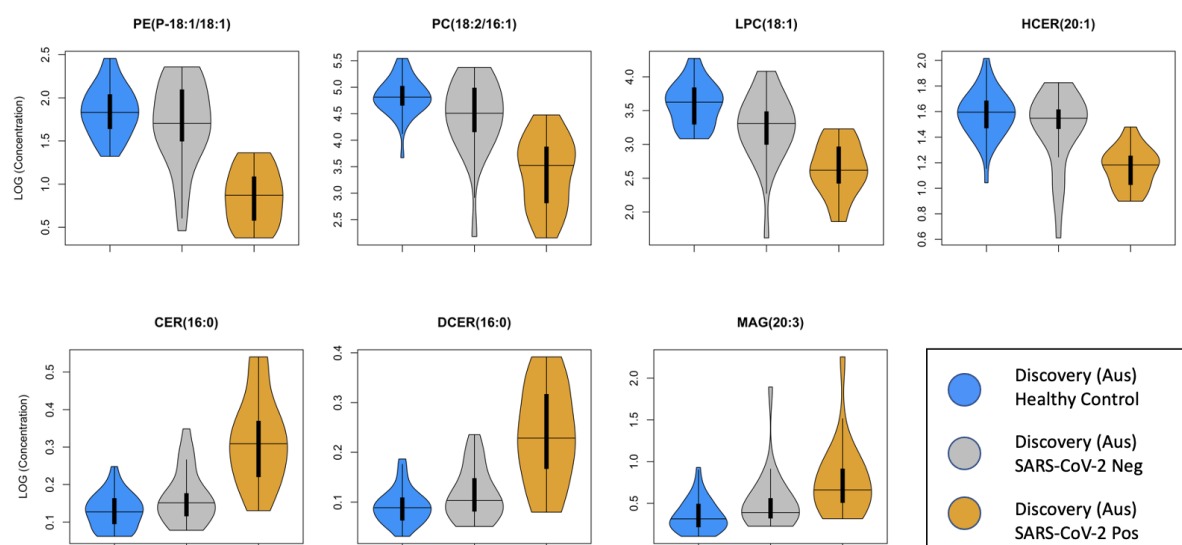

**Figure S2.** Violin plot displaying the distribution of data acquired for the 6-lipid panel from the discovery dataset, comparing Healthy Control, individuals who displayed COVID-19 like symptoms but tested negative for the virus by PCR swab test (SARS-CoV-2 Neg), and SARS-CoV-2 positive.

**Table S1.** Kruskal Wallis Univariate analysis for the seven lipids in the classifier panel. Dunn's Test group comparisons were made for Healthy Control, SARS-CoV-2 negative and SARS-CoV-2 positive

| Lipid                   | Healthy Control mean (sd) | SARS-CoV-2 Neg mean (sd) | SARS-CoV-2 Pos mean (sd) | Kruskal-Wallis p | BH q value | Dunn's Test p Healthy Control vs SARS-CoV-2 neg | Dunn's Test p Healthy Control vs SARS-CoV-2 pos | Dunn's Test p SARS-CoV-2 neg vs SARS-CoV-2 pos |
|-------------------------|---------------------------|--------------------------|--------------------------|------------------|------------|-------------------------------------------------|-------------------------------------------------|------------------------------------------------|
| <b>PE (P-18:1/18:1)</b> | 5.63<br>(1.98)            | 5.1<br>(2.59)            | 1.47<br>(0.80)           | 2.32E-09         | 7.26E-09   | 1.73E-01                                        | 3.80E-10                                        | 1.25E-06                                       |
| <b>PC (18:2/16:1)</b>   | 131.87<br>(45.75)         | 104.03<br>(56.91)        | 35.16<br>(22.50)         | 3.11E-09         | 7.26E-09   | 2.65E-02                                        | 2.06E-10                                        | 4.27E-05                                       |
| <b>LPC(18:1)</b>        | 37.34<br>(12.66)          | 27.74<br>(12.99)         | 14.02<br>(5.60)          | 2.85E-09         | 7.26E-09   | 6.54E-03                                        | 1.82E-10                                        | 2.61E-04                                       |
| <b>HCER(20:1)</b>       | 3.93<br>(0.9)             | 3.5<br>(1.09)            | 2.22<br>(0.51)           | 9.44E-08         | 1.32E-07   | 1.14E-01                                        | 9.64E-09                                        | 3.22E-05                                       |
| <b>CER(16:0)</b>        | 0.14<br>(0.05)            | 0.18<br>(0.09)           | 0.38<br>(0.17)           | 2.24E-08         | 3.92E-08   | 5.06E-02                                        | 1.70E-09                                        | 5.17E-05                                       |
| <b>DCER(16:0)</b>       | 0.10<br>(0.04)            | 0.12<br>(0.06)           | 0.27<br>(0.12)           | 4.89E-07         | 5.71E-07   | 7.64E-02                                        | 4.09E-08                                        | 1.78E-04                                       |
| <b>MAG(20:3)</b>        | 0.45<br>(0.31)            | 0.82<br>(1.12)           | 1.47<br>(1.77)           | 8.95E-06         | 8.95E-06   | 1.90E-02                                        | 7.62E-07                                        | 6.03E-03                                       |

**Table S2.** Kruskal Wallis Univariate analysis for all lipids that were significant in the OPLS-DA model (**259 lipids, Figure 1**). Dunn's Test group comparisons were made for Healthy Control, SARS-CoV-2 negative and SARS-CoV-2 positive

| Lipid            | Healthy Control mean (sd) | SARS-CoV-2 Neg mean (sd) | SARS-CoV-2 Pos mean (sd) | Kruskal-Wallis p | BH q value | Dunn's Test p Healthy Control vs SARS-CoV-2 neg | Dunn's Test p Healthy Control vs SARS-CoV-2 pos | Dunn's Test p SARS-CoV-2 neg vs SARS-CoV-2 pos |
|------------------|---------------------------|--------------------------|--------------------------|------------------|------------|-------------------------------------------------|-------------------------------------------------|------------------------------------------------|
| PE(P-18:1_18:1)  | 5.63 (1.98)               | 5.1 (2.59)               | 1.47 (0.8)               | 2.32E-09         | 3.88E-07   | 1.73E-01                                        | 3.80E-10                                        | 1.25E-06                                       |
| PC(18:2_20:1)    | 1.01 (0.29)               | 0.85 (0.41)              | 0.36 (0.13)              | 2.58E-09         | 3.88E-07   | 4.83E-02                                        | 1.98E-10                                        | 1.51E-05                                       |
| LPC(18:1)        | 37.34 (12.66)             | 27.74 (12.99)            | 14.02 (5.6)              | 2.85E-09         | 3.88E-07   | 6.54E-03                                        | 1.82E-10                                        | 2.61E-04                                       |
| PG(20:0_18:1)    | 0.82 (0.19)               | 0.68 (0.21)              | 0.37 (0.09)              | 6.10E-10         | 3.66E-07   | 1.66E-02                                        | 3.76E-11                                        | 3.28E-05                                       |
| PC(18:2_16:1)    | 131.87 (45.75)            | 104.03 (56.91)           | 35.16 (22.5)             | 3.11E-09         | 3.88E-07   | 2.65E-02                                        | 2.06E-10                                        | 4.27E-05                                       |
| PE(P-16:0_18:2)  | 0.21 (0.1)                | 0.14 (0.07)              | 0.05 (0.03)              | 9.79E-10         | 3.66E-07   | 1.64E-02                                        | 6.06E-11                                        | 4.38E-05                                       |
| PE(P-18:0_22:6)  | 0.08 (0.03)               | 0.07 (0.03)              | 0.03 (0.01)              | 1.36E-08         | 1.27E-06   | 4.07E-02                                        | 9.77E-10                                        | 5.38E-05                                       |
| PE(P-18:1_16:0)  | 0.31 (0.09)               | 0.28 (0.11)              | 0.14 (0.04)              | 1.11E-08         | 1.19E-06   | 1.24E-01                                        | 1.28E-09                                        | 6.98E-06                                       |
| PC(18:1_18:1)    | 147.44 (28.41)            | 125.18 (38.37)           | 79.41 (25.67)            | 2.44E-08         | 1.66E-06   | 2.23E-02                                        | 1.62E-09                                        | 1.81E-04                                       |
| HCER(20:1)       | 3.93 (0.9)                | 3.5 (1.09)               | 2.22 (0.51)              | 9.44E-08         | 3.36E-06   | 1.14E-01                                        | 9.64E-09                                        | 3.22E-05                                       |
| HCER(d18:0_20:0) | 0.09 (0.02)               | 0.08 (0.03)              | 0.05 (0.01)              | 7.67E-08         | 2.87E-06   | 7.88E-02                                        | 6.63E-09                                        | 5.37E-05                                       |
| LPC(18:3)        | 0.3 (0.12)                | 0.24 (0.09)              | 0.12 (0.05)              | 3.03E-08         | 1.74E-06   | 9.68E-02                                        | 2.94E-09                                        | 2.10E-05                                       |
| PC(18:2_18:2)    | 2 (0.99)                  | 1.51 (0.93)              | 0.56 (0.34)              | 5.14E-08         | 2.14E-06   | 3.22E-02                                        | 3.57E-09                                        | 1.67E-04                                       |
| PC(18:2_18:3)    | 0.72 (0.23)               | 0.56 (0.21)              | 0.35 (0.08)              | 1.69E-08         | 1.40E-06   | 1.08E-02                                        | 1.11E-09                                        | 3.73E-04                                       |
| PE(P-16:0_20:1)  | 0.47 (0.17)               | 0.45 (0.21)              | 0.14 (0.09)              | 3.71E-08         | 1.77E-06   | 3.12E-01                                        | 1.00E-08                                        | 1.98E-06                                       |
| HCER(22:1)       | 6.96 (1.63)               | 6.34 (2.31)              | 3.66 (1.08)              | 2.16E-07         | 6.21E-06   | 1.18E-01                                        | 2.20E-08                                        | 5.12E-05                                       |
| PE(P-18:0_18:2)  | 0.1 (0.04)                | 0.09 (0.03)              | 0.05 (0.02)              | 2.87E-08         | 1.74E-06   | 3.66E-02                                        | 2.02E-09                                        | 9.83E-05                                       |
| HCER(d18:0_22:0) | 0.15 (0.04)               | 0.14 (0.05)              | 0.08 (0.02)              | 2.57E-07         | 7.12E-06   | 9.82E-02                                        | 2.38E-08                                        | 7.87E-05                                       |
| LPC(20:1)        | 0.35 (0.09)               | 0.29 (0.09)              | 0.18 (0.06)              | 4.62E-08         | 2.03E-06   | 2.45E-02                                        | 3.12E-09                                        | 2.30E-04                                       |

|                 |                  |                  |                |          |          |          |          |          |
|-----------------|------------------|------------------|----------------|----------|----------|----------|----------|----------|
| PE(P-18:1_18:2) | 0.1 (0.04)       | 0.08 (0.03)      | 0.04 (0.01)    | 3.79E-08 | 1.77E-06 | 1.56E-02 | 2.52E-09 | 3.71E-04 |
| PG(18:2_18:2)   | 0.23 (0.05)      | 0.2 (0.06)       | 0.14 (0.03)    | 1.33E-07 | 4.33E-06 | 2.04E-02 | 9.13E-09 | 5.33E-04 |
| PG(20:0_18:2)   | 0.04 (0.01)      | 0.03 (0.01)      | 0.02 (0.01)    | 3.38E-08 | 1.77E-06 | 9.43E-02 | 3.22E-09 | 2.36E-05 |
| HCER(24:1)      | 0.06 (0.02)      | 0.06 (0.02)      | 0.03 (0.01)    | 2.05E-07 | 6.13E-06 | 1.71E-01 | 2.65E-08 | 2.44E-05 |
| LPE(18:1)       | 2.93 (1.16)      | 2.21 (1.05)      | 1.1 (0.58)     | 9.99E-08 | 3.40E-06 | 1.68E-02 | 6.84E-09 | 5.80E-04 |
| SM(22:1)        | 10.88 (0.91)     | 10.39 (0.79)     | 9.24 (0.72)    | 7.34E-08 | 2.87E-06 | 5.41E-02 | 5.63E-09 | 9.58E-05 |
| PE(P-18:0_20:2) | 2.96 (1.09)      | 3.13 (1.65)      | 1.16 (0.54)    | 2.84E-07 | 7.59E-06 | 4.83E-01 | 1.42E-07 | 2.38E-06 |
| PI(20:0_18:1)   | 0.3 (0.13)       | 0.25 (0.13)      | 0.11 (0.05)    | 1.72E-07 | 5.36E-06 | 1.11E-01 | 1.71E-08 | 4.95E-05 |
| PI(18:1_20:4)   | 0.09 (0.06)      | 0.06 (0.05)      | 0.03 (0.01)    | 4.77E-07 | 1.22E-05 | 1.49E-02 | 3.52E-08 | 1.60E-03 |
| PE(P-18:0_18:0) | 2.02 (0.75)      | 1.93 (0.8)       | 1.02 (0.3)     | 1.07E-06 | 2.58E-05 | 3.08E-01 | 2.24E-07 | 2.08E-05 |
| DCER(22:1)      | 2.05 (0.84)      | 1.95 (0.59)      | 1.16 (0.31)    | 1.19E-06 | 2.78E-05 | 4.29E-01 | 7.87E-07 | 3.91E-06 |
| PC(18:2_20:4)   | 2.51 (1.62)      | 2.63 (2.37)      | 0.8 (0.67)     | 1.40E-06 | 3.08E-05 | 2.33E-01 | 2.14E-07 | 4.65E-05 |
| PE(18:2_20:4)   | 0.04 (0.02)      | 0.04 (0.02)      | 0.02 (0.01)    | 2.63E-06 | 5.32E-05 | 8.59E-02 | 2.26E-07 | 4.16E-04 |
| LPC(18:0)       | 28.01 (7.03)     | 25.18 (7.52)     | 16.82 (5.37)   | 2.47E-06 | 5.28E-05 | 1.07E-01 | 2.29E-07 | 2.83E-04 |
| PC(18:0_18:1)   | 278.4<br>(44.22) | 260.04<br>(64.1) | 197.64 (44.52) | 4.14E-06 | 8.00E-05 | 1.10E-01 | 3.85E-07 | 3.75E-04 |
| PG(18:2_16:1)   | 0.05 (0.01)      | 0.05 (0.02)      | 0.04 (0.01)    | 4.71E-06 | 8.53E-05 | 7.63E-03 | 4.71E-07 | 1.10E-02 |
| CE(20:1)        | 0.83 (0.26)      | 0.68 (0.32)      | 0.47 (0.21)    | 4.52E-06 | 8.45E-05 | 1.21E-02 | 3.99E-07 | 6.77E-03 |
| PC(18:2_20:2)   | 3.53 (1.31)      | 3.47 (1.77)      | 1.3 (1.12)     | 4.17E-06 | 8.00E-05 | 4.10E-01 | 1.19E-06 | 2.68E-05 |
| HCER(26:1)      | 0 (0)            | 0 (0)            | 0 (0)          | 1.32E-06 | 2.99E-05 | 3.13E-02 | 9.76E-08 | 1.14E-03 |
| PC(18:2_22:6)   | 1.74 (0.77)      | 1.55 (0.61)      | 0.88 (0.39)    | 4.79E-06 | 8.53E-05 | 1.89E-01 | 5.88E-07 | 1.61E-04 |
| PI(18:1_18:1)   | 1.11 (0.58)      | 1.06 (0.62)      | 0.53 (0.21)    | 1.66E-05 | 2.48E-04 | 2.33E-01 | 2.28E-06 | 2.49E-04 |
| FFA(22:6)       | 1.44 (0.96)      | 1.02 (0.41)      | 0.84 (0.35)    | 2.59E-06 | 5.32E-05 | 6.40E-03 | 2.57E-07 | 9.61E-03 |
| PE(P-16:0_22:6) | 0.14 (0.05)      | 0.13 (0.05)      | 0.08 (0.02)    | 7.10E-06 | 1.24E-04 | 2.33E-01 | 1.01E-06 | 1.40E-04 |
| LPC(18:2)       | 0.63 (0.3)       | 0.51 (0.24)      | 0.28 (0.14)    | 8.89E-06 | 1.46E-04 | 1.21E-01 | 8.53E-07 | 5.21E-04 |
| PC(20:0_20:3)   | 2.2 (0.82)       | 1.72 (0.6)       | 1.3 (0.48)     | 9.56E-06 | 1.52E-04 | 1.54E-02 | 8.51E-07 | 7.81E-03 |

|                  |                     |                    |                 |          |          |          |          |          |
|------------------|---------------------|--------------------|-----------------|----------|----------|----------|----------|----------|
| PC(20:0_18:1)    | 1.08 (0.45)         | 0.99 (0.44)        | 0.49 (0.32)     | 1.45E-05 | 2.21E-04 | 2.19E-01 | 1.91E-06 | 2.54E-04 |
| LPE(18:0)        | 2.14 (0.86)         | 1.69 (0.66)        | 1.14 (0.51)     | 3.24E-05 | 4.49E-04 | 3.95E-02 | 2.74E-06 | 5.34E-03 |
| PE(P-18:0_16:0)  | 0.06 (0.02)         | 0.05 (0.02)        | 0.04 (0.01)     | 2.42E-05 | 3.42E-04 | 1.01E-01 | 2.20E-06 | 1.28E-03 |
| PI(18:0_20:0)    | 0.16 (0.09)         | 0.13 (0.07)        | 0.07 (0.04)     | 2.09E-05 | 3.01E-04 | 1.26E-01 | 2.02E-06 | 8.43E-04 |
| LPC(16:1)        | 33.07 (8.23)        | 33.15 (8.93)       | 21.41 (7.36)    | 9.80E-06 | 1.53E-04 | 2.86E-01 | 1.11E-05 | 8.40E-06 |
| HCER(d18:0_26:1) | 0.25 (0.09)         | 0.23 (0.09)        | 0.14 (0.04)     | 3.46E-05 | 4.62E-04 | 3.73E-01 | 7.39E-06 | 1.53E-04 |
| LPE(18:2)        | 0.07 (0.04)         | 0.05 (0.03)        | 0.03 (0.02)     | 6.92E-05 | 7.96E-04 | 1.05E-01 | 6.41E-06 | 2.34E-03 |
| PC(18:1_18:3)    | 1.77 (0.59)         | 1.44 (0.48)        | 1.06 (0.4)      | 3.74E-05 | 4.91E-04 | 2.15E-02 | 3.48E-06 | 1.15E-02 |
| PS(20:0_22:6)    | 16.07 (4.12)        | 15.59 (4.2)        | 10.92 (2.65)    | 3.34E-05 | 4.54E-04 | 3.38E-01 | 6.33E-06 | 1.86E-04 |
| CER(22:1)        | 19.54 (5.07)        | 19.05 (5.28)       | 13.37 (3.78)    | 3.83E-05 | 4.94E-04 | 4.77E-01 | 1.43E-05 | 7.00E-05 |
| LPC(20:0)        | 0.4 (0.13)          | 0.34 (0.1)         | 0.26 (0.08)     | 7.21E-05 | 8.17E-04 | 4.26E-02 | 6.36E-06 | 7.75E-03 |
| LPE(18:3)        | 0.05 (0.02)         | 0.04 (0.01)        | 0.03 (0.01)     | 4.58E-05 | 5.81E-04 | 5.75E-02 | 3.92E-06 | 4.12E-03 |
| PC(14:0_18:1)    | 13.14 (5.96)        | 11.72 (6.24)       | 5.68 (4.79)     | 5.52E-05 | 6.55E-04 | 1.76E-01 | 6.15E-06 | 9.10E-04 |
| PC(16:0_18:1)    | 596.29<br>(124.19)  | 540.32<br>(151.71) | 425.05 (126.66) | 8.98E-05 | 9.88E-04 | 6.29E-02 | 7.92E-06 | 5.48E-03 |
| PC(18:1_18:2)    | 3.47 (1.45)         | 2.99 (1.49)        | 1.79 (1.06)     | 7.72E-05 | 8.62E-04 | 1.15E-01 | 7.32E-06 | 2.21E-03 |
| LPC(20:2)        | 1.84 (0.54)         | 1.59 (0.54)        | 1.08 (0.55)     | 1.05E-04 | 1.12E-03 | 8.16E-02 | 9.43E-06 | 4.30E-03 |
| LPE(22:4)        | 0.08 (0.02)         | 0.07 (0.02)        | 0.05 (0.02)     | 4.72E-05 | 5.88E-04 | 3.43E-03 | 8.98E-06 | 6.72E-02 |
| PG(16:0_18:1)    | 0.03 (0.02)         | 0.02 (0.01)        | 0.01 (0.01)     | 6.04E-05 | 7.06E-04 | 7.85E-03 | 8.12E-06 | 3.86E-02 |
| PI(18:1_16:1)    | 6.05 (3.16)         | 5.97 (3.27)        | 2.56 (1.87)     | 5.18E-05 | 6.25E-04 | 4.77E-01 | 1.58E-05 | 1.13E-04 |
| TAG(56:2_FA18:0) | 1.26 (0.58)         | 0.94 (0.5)         | 0.62 (0.38)     | 1.30E-04 | 1.35E-03 | 1.90E-02 | 1.41E-05 | 2.54E-02 |
| CE(18:1)         | 1077.14<br>(176.33) | 993.96<br>(256.34) | 754.22 (253.94) | 2.45E-04 | 2.32E-03 | 1.87E-01 | 2.77E-05 | 2.20E-03 |
| SM(24:1)         | 0.45 (0.15)         | 0.4 (0.14)         | 0.28 (0.1)      | 1.73E-04 | 1.73E-03 | 1.55E-01 | 1.81E-05 | 2.36E-03 |
| CE(18:3)         | 0.05 (0.03)         | 0.04 (0.02)        | 0.02 (0.02)     | 2.06E-04 | 2.02E-03 | 1.34E-01 | 2.07E-05 | 3.27E-03 |
| PI(18:0_18:0)    | 3.06 (1.22)         | 3.02 (1.48)        | 1.77 (0.74)     | 3.27E-04 | 2.98E-03 | 3.62E-01 | 5.95E-05 | 8.16E-04 |



|                  |                |                |                |          |          |          |          |          |
|------------------|----------------|----------------|----------------|----------|----------|----------|----------|----------|
| SM(22:0)         | 19.39 (3.35)   | 18.54 (3.43)   | 15.31 (2.91)   | 2.63E-04 | 2.46E-03 | 2.47E-01 | 3.46E-05 | 1.45E-03 |
| LPC(22:4)        | 0.13 (0.05)    | 0.1 (0.03)     | 0.08 (0.03)    | 2.08E-04 | 2.02E-03 | 4.54E-02 | 1.96E-05 | 1.32E-02 |
| LCER(22:1)       | 0.67 (0.2)     | 0.66 (0.18)    | 0.49 (0.14)    | 2.11E-04 | 2.02E-03 | 3.88E-01 | 9.84E-05 | 1.64E-04 |
| DCER(22:0)       | 0.53 (0.17)    | 0.53 (0.25)    | 0.32 (0.19)    | 4.00E-04 | 3.52E-03 | 3.91E-01 | 7.88E-05 | 8.05E-04 |
| LCER(d18:0_22:0) | 0.01 (0)       | 0.01 (0)       | 0.01 (0)       | 1.58E-04 | 1.62E-03 | 3.26E-01 | 1.01E-04 | 9.56E-05 |
| HCER(18:1)       | 0.44 (0.13)    | 0.41 (0.14)    | 0.31 (0.1)     | 1.09E-03 | 8.86E-03 | 1.88E-01 | 1.25E-04 | 5.90E-03 |
| PC(18:1_20:1)    | 0.99 (0.39)    | 0.95 (0.44)    | 0.64 (0.26)    | 1.46E-03 | 1.14E-02 | 3.25E-01 | 2.27E-04 | 2.93E-03 |
| FFA(24:1)        | 0.02 (0.01)    | 0.02 (0.01)    | 0.01 (0)       | 1.20E-04 | 1.26E-03 | 3.01E-01 | 9.12E-05 | 6.75E-05 |
| LCER(d18:0_24:1) | 2.69 (0.76)    | 2.87 (1.08)    | 1.63 (0.96)    | 2.88E-04 | 2.66E-03 | 2.71E-01 | 2.32E-04 | 1.18E-04 |
| CE(14:0)         | 385.98 (94.64) | 336.14 (112.7) | 289.82 (90.74) | 2.57E-03 | 1.81E-02 | 2.79E-02 | 3.73E-04 | 8.66E-02 |
| DCER(24:1)       | 0.03 (0.02)    | 0.03 (0.01)    | 0.02 (0.01)    | 3.17E-03 | 2.06E-02 | 2.06E-01 | 3.82E-04 | 1.05E-02 |
| PG(20:0_20:3)    | 0.36 (0.08)    | 0.3 (0.08)     | 0.27 (0.08)    | 7.84E-04 | 6.52E-03 | 4.41E-03 | 2.41E-04 | 1.97E-01 |
| TAG(54:1_FA18:1) | 2.12 (1.13)    | 1.64 (1.01)    | 1.2 (1.07)     | 2.52E-03 | 1.81E-02 | 5.48E-02 | 2.93E-04 | 4.52E-02 |
| PC(14:0_20:4)    | 0.37 (0.14)    | 0.34 (0.24)    | 0.22 (0.25)    | 1.61E-03 | 1.23E-02 | 1.38E-01 | 1.72E-04 | 1.18E-02 |
| PC(16:0_18:3)    | 3.69 (1.27)    | 3.41 (1.48)    | 2.53 (0.99)    | 2.49E-03 | 1.81E-02 | 1.34E-01 | 2.70E-04 | 1.61E-02 |
| PI(18:2_18:2)    | 0.55 (0.19)    | 0.46 (0.15)    | 0.39 (0.11)    | 2.89E-03 | 1.97E-02 | 4.62E-02 | 3.58E-04 | 5.78E-02 |
| HCER(d18:0_18:0) | 0.01 (0)       | 0.01 (0)       | 0.01 (0)       | 2.81E-03 | 1.94E-02 | 4.89E-01 | 6.74E-04 | 2.15E-03 |
| PC(18:0_20:1)    | 23.84 (9.94)   | 24.65 (12.31)  | 14.95 (6.96)   | 3.15E-03 | 2.06E-02 | 4.76E-01 | 7.21E-04 | 2.49E-03 |
| PS(20:0_18:1)    | 30.89 (10.01)  | 28.53 (13.39)  | 20.75 (12.23)  | 3.01E-03 | 2.01E-02 | 1.43E-01 | 3.33E-04 | 1.67E-02 |
| DCER(26:0)       | 0.06 (0.03)    | 0.06 (0.04)    | 0.04 (0.02)    | 3.67E-03 | 2.33E-02 | 3.17E-01 | 5.52E-04 | 5.94E-03 |
| PC(16:0_20:1)    | 6.33 (2.82)    | 5.99 (2.88)    | 4.18 (1.65)    | 3.24E-03 | 2.09E-02 | 3.08E-01 | 4.78E-04 | 5.70E-03 |
| LPC(20:5)        | 0.07 (0.02)    | 0.06 (0.03)    | 0.05 (0.02)    | 1.21E-02 | 5.95E-02 | 4.75E-02 | 1.89E-03 | 1.26E-01 |
| PC(16:1_18:2)    | 0.18 (0.08)    | 0.19 (0.1)     | 0.11 (0.07)    | 2.56E-03 | 1.81E-02 | 4.26E-01 | 8.19E-04 | 1.39E-03 |

|                  |                   |                   |                |          |          |          |          |          |
|------------------|-------------------|-------------------|----------------|----------|----------|----------|----------|----------|
| PE(P-18:0_20:3)  | 13.68 (5.15)      | 13.4 (6.72)       | 9.53 (3.54)    | 9.40E-03 | 4.92E-02 | 1.51E-01 | 1.13E-03 | 3.27E-02 |
| LCER(20:0)       | 0.12 (0.04)       | 0.12 (0.03)       | 0.09 (0.03)    | 2.27E-03 | 1.70E-02 | 2.78E-01 | 1.38E-03 | 6.82E-04 |
| PC(18:1_22:6)    | 9.34 (3.7)        | 8.14 (3.46)       | 6.4 (4.18)     | 7.97E-03 | 4.52E-02 | 1.24E-01 | 9.40E-04 | 3.70E-02 |
| PS(20:0_18:2)    | 1.2 (0.45)        | 1.06 (0.5)        | 0.89 (0.84)    | 5.74E-03 | 3.49E-02 | 1.31E-01 | 6.59E-04 | 2.82E-02 |
| CER(24:1)        | 0.37 (0.17)       | 0.35 (0.13)       | 0.24 (0.14)    | 6.16E-03 | 3.69E-02 | 4.98E-01 | 1.46E-03 | 3.81E-03 |
| FFA(18:3)        | 0.71 (0.27)       | 0.66 (0.38)       | 0.53 (0.12)    | 1.11E-02 | 5.57E-02 | 6.55E-02 | 1.52E-03 | 8.91E-02 |
| PE(18:1_18:1)    | 5.38 (4.2)        | 4.27 (2.36)       | 3.17 (2.94)    | 8.48E-03 | 4.68E-02 | 2.17E-01 | 1.07E-03 | 1.90E-02 |
| PG(18:1_20:4)    | 0.19 (0.03)       | 0.18 (0.04)       | 0.17 (0.03)    | 1.03E-02 | 5.24E-02 | 5.74E-02 | 1.45E-03 | 9.67E-02 |
| LPC(22:6)        | 1.34 (0.35)       | 1.23 (0.41)       | 1.04 (0.45)    | 1.45E-02 | 6.74E-02 | 1.24E-01 | 1.82E-03 | 5.40E-02 |
| PC(18:1_20:4)    | 6.86 (3.57)       | 7.44 (5.06)       | 4.39 (3.1)     | 9.54E-03 | 4.92E-02 | 4.22E-01 | 1.81E-03 | 7.29E-03 |
| PI(18:1_18:2)    | 0.74 (0.26)       | 0.64 (0.26)       | 0.52 (0.34)    | 8.85E-03 | 4.80E-02 | 9.62E-02 | 1.08E-03 | 5.26E-02 |
| CE(22:6)         | 0.02 (0)          | 0.02 (0)          | 0.01 (0.01)    | 1.12E-02 | 5.59E-02 | 1.87E-01 | 1.39E-03 | 2.79E-02 |
| LPC(14:0)        | 135.57<br>(27.19) | 135.84<br>(38.99) | 102.56 (36.43) | 7.83E-03 | 4.47E-02 | 4.48E-01 | 2.16E-03 | 3.71E-03 |
| PC(14:0_14:0)    | 6.35 (2.37)       | 6.66 (3.68)       | 4.08 (3.32)    | 9.35E-03 | 4.92E-02 | 3.91E-01 | 1.65E-03 | 8.25E-03 |
| PC(14:0_18:3)    | 0.85 (0.48)       | 0.9 (0.65)        | 0.5 (0.57)     | 1.23E-02 | 6.01E-02 | 4.62E-01 | 2.57E-03 | 7.52E-03 |
| PC(18:1_22:5)    | 7.65 (2.83)       | 6.52 (2.75)       | 5.65 (1.65)    | 1.35E-02 | 6.51E-02 | 2.76E-02 | 2.85E-03 | 2.08E-01 |
| TAG(50:1_FA18:1) | 0.26 (0.18)       | 0.2 (0.18)        | 0.13 (0.1)     | 1.68E-02 | 7.66E-02 | 8.06E-02 | 2.33E-03 | 9.32E-02 |
| TAG(52:0_FA18:0) | 0.73 (0.52)       | 0.5 (0.38)        | 0.43 (0.58)    | 8.56E-03 | 4.68E-02 | 5.09E-02 | 1.22E-03 | 9.74E-02 |
| PC(14:0_20:3)    | 2.7 (1.09)        | 2.6 (1.74)        | 1.77 (1.71)    | 1.32E-02 | 6.41E-02 | 1.90E-01 | 1.67E-03 | 3.07E-02 |
| PC(18:0_18:2)    | 2.64 (1.43)       | 2.64 (1.39)       | 1.73 (0.66)    | 1.60E-02 | 7.34E-02 | 4.67E-01 | 3.36E-03 | 9.08E-03 |
| PC(18:0_22:6)    | 47.66<br>(12.43)  | 45.38<br>(14.03)  | 36.96 (14.48)  | 1.87E-02 | 8.33E-02 | 2.02E-01 | 2.45E-03 | 3.59E-02 |
| PE(18:0_22:6)    | 0.57 (0.31)       | 0.45 (0.25)       | 0.35 (0.18)    | 1.42E-02 | 6.72E-02 | 5.05E-02 | 2.24E-03 | 1.30E-01 |
| PI(18:0_18:1)    | 34.04<br>(17.92)  | 31.96<br>(17.41)  | 21.68 (10.06)  | 2.14E-02 | 9.42E-02 | 3.10E-01 | 3.24E-03 | 2.20E-02 |
| TAG(56:6_FA18:   | 0.31 (0.2)        | 0.21 (0.14)       | 0.18 (0.08)    | 1.16E-02 | 5.75E-02 | 1.36E-02 | 3.79E-03 | 3.18E-01 |

|                      |                    |                    |                 |          |          |          |          |          |
|----------------------|--------------------|--------------------|-----------------|----------|----------|----------|----------|----------|
| 3)                   |                    |                    |                 |          |          |          |          |          |
| PG(18:1_16:1)        | 0.11 (0.02)        | 0.11 (0.03)        | 0.09 (0.03)     | 3.62E-02 | 1.37E-01 | 2.01E-01 | 5.03E-03 | 5.70E-02 |
| CE(18:2)             | 337.28<br>(128.92) | 318.78<br>(160.44) | 266.18 (229.73) | 2.19E-02 | 9.52E-02 | 2.39E-01 | 3.00E-03 | 3.21E-02 |
| CE(22:4)             | 2.23 (0.57)        | 2.08 (0.86)        | 1.8 (0.69)      | 2.60E-02 | 1.09E-01 | 6.63E-02 | 4.20E-03 | 1.45E-01 |
| TAG(48:4_FA18:<br>1) | 3.85 (4.19)        | 1.81 (1.49)        | 1.7 (1.79)      | 1.76E-02 | 7.98E-02 | 2.60E-02 | 4.18E-03 | 2.50E-01 |
| TAG(48:5_FA18:<br>2) | 0.36 (0.45)        | 0.16 (0.13)        | 0.18 (0.25)     | 1.41E-02 | 6.72E-02 | 1.61E-02 | 4.33E-03 | 3.12E-01 |
| HCER(26:0)           | 0.04 (0.01)        | 0.04 (0.01)        | 0.03 (0.01)     | 3.89E-02 | 1.46E-01 | 4.94E-01 | 8.63E-03 | 1.68E-02 |
| PC(18:1_20:2)        | 18.9 (5.2)         | 18.47 (7.12)       | 13.89 (9.26)    | 4.18E-02 | 1.53E-01 | 4.34E-01 | 8.11E-03 | 2.20E-02 |
| PI(18:0_20:4)        | 0.17 (0.06)        | 0.17 (0.08)        | 0.13 (0.06)     | 4.07E-02 | 1.52E-01 | 2.46E-01 | 5.89E-03 | 4.80E-02 |
| TAG(47:2_FA18:<br>1) | 0.94 (0.8)         | 0.58 (0.58)        | 0.56 (0.79)     | 2.49E-02 | 1.06E-01 | 3.53E-02 | 5.45E-03 | 2.38E-01 |
| PC(16:0_16:1)        | 3.99 (1.09)        | 4.08 (1.23)        | 3.3 (0.96)      | 3.04E-02 | 1.23E-01 | 3.84E-01 | 9.58E-03 | 9.11E-03 |
| PI(16:0_20:2)        | 0.63 (0.36)        | 0.68 (0.29)        | 0.43 (0.32)     | 9.46E-03 | 4.92E-02 | 1.10E-01 | 1.53E-02 | 1.30E-03 |
| TAG(44:2_FA18:<br>1) | 2.28 (2.62)        | 1.08 (1.57)        | 1.08 (1.83)     | 2.71E-02 | 1.13E-01 | 3.23E-02 | 6.44E-03 | 2.66E-01 |
| TAG(46:3_FA18:<br>3) | 0.57 (0.7)         | 0.24 (0.26)        | 0.26 (0.37)     | 2.45E-02 | 1.05E-01 | 2.34E-02 | 7.07E-03 | 3.19E-01 |
| PC(14:0_22:6)        | 2.36 (1.09)        | 2.61 (1.53)        | 1.71 (1.18)     | 2.98E-02 | 1.22E-01 | 3.99E-01 | 8.96E-03 | 9.41E-03 |
| PE(18:1_18:2)        | 0.38 (0.35)        | 0.23 (0.14)        | 0.2 (0.18)      | 3.11E-02 | 1.23E-01 | 5.70E-02 | 5.59E-03 | 1.84E-01 |
| TAG(46:2_FA18:<br>1) | 5.87 (5.57)        | 3.75 (4.45)        | 3.09 (3.93)     | 3.32E-02 | 1.29E-01 | 6.02E-02 | 5.92E-03 | 1.82E-01 |
| TAG(46:3_FA18:<br>1) | 2.35 (2.22)        | 1.35 (1.73)        | 1.33 (1.89)     | 2.94E-02 | 1.21E-01 | 2.91E-02 | 7.77E-03 | 3.01E-01 |
| TAG(56:5_FA18:<br>2) | 0.47 (0.33)        | 0.32 (0.22)        | 0.27 (0.16)     | 3.12E-02 | 1.23E-01 | 3.45E-02 | 7.46E-03 | 2.74E-01 |
| LCER(26:1)           | 0.01 (0)           | 0.01 (0)           | 0.01 (0)        | 7.52E-03 | 4.34E-02 | 1.09E-01 | 1.27E-02 | 1.03E-03 |
| TAG(44:2_FA18:<br>2) | 0.5 (0.52)         | 0.28 (0.49)        | 0.28 (0.45)     | 3.11E-02 | 1.23E-01 | 2.49E-02 | 9.41E-03 | 3.44E-01 |
| TAG(50:5_FA18:<br>1) | 2.22 (2.19)        | 1.32 (1.01)        | 1.3 (1.33)      | 4.14E-02 | 1.53E-01 | 4.64E-02 | 9.06E-03 | 2.55E-01 |

|                      |              |                  |               |          |          |          |          |          |
|----------------------|--------------|------------------|---------------|----------|----------|----------|----------|----------|
| TAG(51:4_FA20:<br>4) | 0.54 (0.47)  | 0.32 (0.21)      | 0.31 (0.27)   | 2.96E-02 | 1.22E-01 | 3.80E-02 | 6.55E-03 | 2.47E-01 |
| TAG(54:8_FA18:<br>2) | 1.04 (1.65)  | 0.53 (0.59)      | 0.41 (0.4)    | 4.21E-02 | 1.53E-01 | 5.90E-02 | 8.09E-03 | 2.12E-01 |
| LPC(20:3)            | 1.64 (0.54)  | 1.4 (0.51)       | 1.34 (0.39)   | 4.50E-02 | 1.62E-01 | 2.70E-02 | 1.51E-02 | 3.94E-01 |
| TAG(46:3_FA18:<br>2) | 0.6 (0.63)   | 0.32 (0.34)      | 0.37 (0.56)   | 3.39E-02 | 1.31E-01 | 2.83E-02 | 9.64E-03 | 3.30E-01 |
| TAG(48:4_FA20:<br>4) | 0.46 (0.56)  | 0.21 (0.18)      | 0.24 (0.35)   | 3.43E-02 | 1.32E-01 | 2.73E-02 | 1.01E-02 | 3.40E-01 |
| TAG(56:3_FA18:<br>2) | 0.66 (0.56)  | 0.45 (0.47)      | 0.33 (0.26)   | 4.60E-02 | 1.65E-01 | 4.31E-02 | 1.10E-02 | 2.87E-01 |
| TAG(50:5_FA18:<br>2) | 1.73 (1.62)  | 1.05 (0.72)      | 1.29 (1.58)   | 4.51E-02 | 1.62E-01 | 3.63E-02 | 1.20E-02 | 3.22E-01 |
| CE(22:2)             | 0.41 (0.13)  | 0.34 (0.16)      | 0.34 (0.11)   | 3.54E-02 | 1.35E-01 | 1.11E-02 | 2.55E-02 | 4.06E-01 |
| LPE(20:3)            | 0.5 (0.16)   | 0.38 (0.11)      | 0.41 (0.17)   | 8.36E-03 | 4.67E-02 | 1.96E-03 | 1.86E-02 | 2.61E-01 |
| TAG(51:5_FA18:<br>2) | 0.38 (0.31)  | 0.23 (0.15)      | 0.27 (0.27)   | 4.16E-02 | 1.53E-01 | 2.62E-02 | 1.37E-02 | 3.86E-01 |
| DAG(18:2_22:5)       | 0.03 (0.01)  | 0.04 (0.01)      | 0.03 (0.03)   | 1.46E-02 | 6.74E-02 | 4.59E-02 | 5.51E-02 | 1.84E-03 |
| TAG(58:6_FA18:<br>1) | 0.11 (0.04)  | 0.1 (0.05)       | 0.14 (0.05)   | 2.75E-02 | 1.14E-01 | 1.08E-01 | 3.83E-02 | 3.82E-03 |
| TAG(58:7_FA20:<br>4) | 0.16 (0.09)  | 0.13 (0.09)      | 0.2 (0.07)    | 9.48E-03 | 4.92E-02 | 1.15E-01 | 1.45E-02 | 1.32E-03 |
| TAG(56:6_FA20:<br>5) | 0.57 (0.37)  | 0.55 (0.4)       | 0.82 (0.42)   | 2.45E-02 | 1.05E-01 | 3.00E-01 | 1.07E-02 | 5.80E-03 |
| DAG(18:0_18:3)       | 0.01 (0.01)  | 0.01 (0.01)      | 0.02 (0.01)   | 3.12E-02 | 1.23E-01 | 6.48E-02 | 5.29E-03 | 1.65E-01 |
| TAG(52:3_FA16:<br>0) | 14.32 (6.14) | 16.02 (8.65)     | 20.65 (10.83) | 4.22E-02 | 1.53E-01 | 3.36E-01 | 6.84E-03 | 3.24E-02 |
| TAG(56:7_FA20:<br>3) | 3.06 (1.22)  | 2.83 (1.48)      | 4 (1.44)      | 5.94E-03 | 3.58E-02 | 1.19E-01 | 9.43E-03 | 8.52E-04 |
| TAG(58:7_FA18:<br>2) | 0.09 (0.04)  | 0.09 (0.06)      | 0.12 (0.05)   | 3.26E-02 | 1.27E-01 | 4.70E-01 | 7.95E-03 | 1.28E-02 |
| DAG(18:0_22:6)       | 16.01 (7.82) | 18.01<br>(10.84) | 25.71 (15.14) | 3.21E-02 | 1.26E-01 | 2.84E-01 | 4.76E-03 | 3.35E-02 |
| TAG(56:4_FA22:<br>4) | 2.21 (1.84)  | 3.18 (4)         | 4.86 (4.76)   | 4.17E-02 | 1.53E-01 | 3.81E-01 | 7.28E-03 | 2.67E-02 |
| DAG(16:0_16:0)       | 0.32 (0.21)  | 0.56 (0.78)      | 0.72 (0.74)   | 3.59E-02 | 1.36E-01 | 1.53E-01 | 4.97E-03 | 7.73E-02 |

|                   |             |              |              |          |          |          |          |          |
|-------------------|-------------|--------------|--------------|----------|----------|----------|----------|----------|
| TAG(54:4_FA20:4)  | 0.23 (0.2)  | 0.35 (0.5)   | 0.43 (0.31)  | 3.21E-02 | 1.26E-01 | 4.28E-01 | 6.13E-03 | 1.83E-02 |
| TAG(56:6_FA16:0)  | 0.32 (0.18) | 0.32 (0.19)  | 0.43 (0.17)  | 1.81E-02 | 8.16E-02 | 4.56E-01 | 4.68E-03 | 7.54E-03 |
| TAG(58:6_FA18:0)  | 0.84 (0.61) | 1.02 (1.04)  | 1.5 (1.2)    | 2.18E-02 | 9.52E-02 | 3.89E-01 | 6.89E-03 | 6.99E-03 |
| DAG(16:1_22:6)    | 1.31 (0.93) | 1.93 (1.7)   | 2.31 (1.68)  | 3.07E-02 | 1.23E-01 | 1.09E-01 | 4.37E-03 | 1.00E-01 |
| DAG(16:0_22:5)    | 0.1 (0.07)  | 0.16 (0.14)  | 0.17 (0.12)  | 2.28E-02 | 9.86E-02 | 4.94E-02 | 4.06E-03 | 1.74E-01 |
| DCER(24:0)        | 0.45 (0.23) | 0.46 (0.24)  | 0.69 (0.33)  | 2.56E-02 | 1.08E-01 | 4.65E-01 | 5.32E-03 | 1.33E-02 |
| DAG(18:2_20:3)    | 0.19 (0.09) | 0.22 (0.17)  | 0.29 (0.14)  | 7.35E-03 | 4.30E-02 | 4.80E-01 | 1.84E-03 | 3.99E-03 |
| DAG(18:1_22:5)    | 0.32 (0.21) | 0.46 (0.34)  | 0.57 (0.38)  | 1.86E-02 | 8.33E-02 | 6.90E-02 | 2.76E-03 | 1.15E-01 |
| SM(16:0)          | 21.89 (3.8) | 22.43 (3.42) | 25.46 (4.93) | 1.09E-02 | 5.51E-02 | 2.70E-01 | 1.51E-03 | 1.66E-02 |
| TAG(52:4_FA20:3)  | 1.61 (1.14) | 2.16 (2.26)  | 2.82 (2.06)  | 2.13E-02 | 9.42E-02 | 2.69E-01 | 3.02E-03 | 2.68E-02 |
| TAG(56:5_FA20:4)  | 1.25 (0.84) | 1.42 (1.25)  | 2.25 (1.47)  | 1.41E-02 | 6.72E-02 | 4.83E-01 | 3.09E-03 | 7.70E-03 |
| PG(18:0_18:2)     | 0.13 (0.02) | 0.13 (0.03)  | 0.14 (0.02)  | 1.43E-02 | 6.73E-02 | 1.46E-01 | 1.78E-03 | 4.46E-02 |
| PI(20:0_18:2)     | 6.31 (3.81) | 7.99 (4.28)  | 11.94 (8.8)  | 7.54E-03 | 4.34E-02 | 5.23E-02 | 1.04E-03 | 8.84E-02 |
| TAG(58:7_FA22:6)  | 0.96 (0.76) | 1.13 (0.88)  | 1.74 (1.13)  | 9.85E-03 | 5.05E-02 | 2.87E-01 | 1.40E-03 | 1.41E-02 |
| TAG(60:10_FA22:5) | 0.13 (0.08) | 0.17 (0.13)  | 0.21 (0.1)   | 1.44E-02 | 6.73E-02 | 2.20E-01 | 1.89E-03 | 2.69E-02 |
| CER(14:0)         | 0.36 (0.08) | 0.36 (0.05)  | 0.47 (0.14)  | 4.69E-03 | 2.90E-02 | 4.25E-01 | 9.14E-04 | 4.21E-03 |
| DAG(18:1_20:5)    | 0.05 (0.03) | 0.07 (0.06)  | 0.11 (0.08)  | 8.32E-03 | 4.67E-02 | 2.22E-01 | 1.06E-03 | 1.81E-02 |
| DCER(18:0)        | 0.08 (0.02) | 0.09 (0.02)  | 0.13 (0.05)  | 7.22E-03 | 4.29E-02 | 3.09E-01 | 1.07E-03 | 1.01E-02 |
| PE(O-18:0_18:2)   | 0.55 (0.2)  | 0.62 (0.33)  | 0.85 (0.38)  | 8.57E-03 | 4.68E-02 | 2.85E-01 | 1.21E-03 | 1.29E-02 |
| TAG(54:4_FA22:4)  | 4.3 (3.12)  | 5.73 (5.2)   | 8.93 (7.4)   | 9.25E-03 | 4.92E-02 | 1.90E-01 | 1.14E-03 | 2.42E-02 |
| TAG(54:6_FA20:3)  | 4.72 (2.21) | 4.92 (2.74)  | 7.98 (4.52)  | 3.92E-03 | 2.46E-02 | 4.44E-01 | 8.11E-04 | 3.38E-03 |
| TAG(58:8_FA20:4)  | 0.27 (0.11) | 0.25 (0.13)  | 0.38 (0.13)  | 2.37E-03 | 1.76E-02 | 2.59E-01 | 1.58E-03 | 6.55E-04 |

|                  |             |              |              |          |          |          |          |          |
|------------------|-------------|--------------|--------------|----------|----------|----------|----------|----------|
| DAG(16:0_20:5)   | 0.06 (0.04) | 0.09 (0.08)  | 0.12 (0.07)  | 7.31E-03 | 4.30E-02 | 1.80E-01 | 8.81E-04 | 2.22E-02 |
| TAG(58:7_FA16:0) | 0.2 (0.17)  | 0.28 (0.24)  | 0.36 (0.24)  | 9.10E-03 | 4.90E-02 | 9.18E-02 | 1.12E-03 | 5.63E-02 |
| DAG(16:1_20:2)   | 0.04 (0.02) | 0.06 (0.06)  | 0.09 (0.08)  | 5.14E-03 | 3.15E-02 | 1.77E-01 | 6.06E-04 | 1.79E-02 |
| DAG(16:1_20:4)   | 0.03 (0.02) | 0.06 (0.05)  | 0.08 (0.07)  | 4.16E-03 | 2.59E-02 | 4.27E-02 | 5.56E-04 | 7.63E-02 |
| MAG(18:0)        | 2.43 (1.63) | 4.81 (7.71)  | 6.31 (7.89)  | 1.18E-03 | 9.49E-03 | 6.08E-03 | 3.26E-04 | 1.90E-01 |
| TAG(58:6_FA20:4) | 0.31 (0.18) | 0.3 (0.22)   | 0.51 (0.24)  | 1.45E-03 | 1.14E-02 | 2.92E-01 | 8.64E-04 | 4.95E-04 |
| TAG(55:5_FA18:2) | 0.25 (0.12) | 0.3 (0.23)   | 0.5 (0.34)   | 2.78E-03 | 1.94E-02 | 3.38E-01 | 4.41E-04 | 4.35E-03 |
| CER(24:0)        | 6.89 (1.71) | 7.31 (2.1)   | 9.51 (3.01)  | 2.99E-03 | 2.01E-02 | 3.33E-01 | 4.67E-04 | 4.71E-03 |
| DAG(18:2_22:4)   | 0.02 (0.01) | 0.03 (0.02)  | 0.04 (0.02)  | 1.88E-03 | 1.42E-02 | 4.39E-01 | 3.95E-04 | 1.98E-03 |
| TAG(54:5_FA20:3) | 7.23 (3.24) | 8 (4.42)     | 12.21 (6.43) | 2.57E-03 | 1.81E-02 | 3.07E-01 | 3.80E-04 | 4.86E-03 |
| TAG(58:9_FA22:6) | 0.03 (0.02) | 0.04 (0.02)  | 0.06 (0.02)  | 3.03E-03 | 2.01E-02 | 3.46E-01 | 4.88E-04 | 4.45E-03 |
| DAG(16:0_20:3)   | 0.14 (0.09) | 0.19 (0.19)  | 0.27 (0.17)  | 2.82E-03 | 1.94E-02 | 1.71E-01 | 3.22E-04 | 1.26E-02 |
| DAG(18:2_20:5)   | 0.01 (0.01) | 0.01 (0.01)  | 0.01 (0.01)  | 1.26E-03 | 1.00E-02 | 4.63E-01 | 2.92E-04 | 1.31E-03 |
| LPI(20:3)        | 0.13 (0.04) | 0.15 (0.06)  | 0.17 (0.04)  | 3.42E-03 | 2.19E-02 | 9.34E-02 | 3.78E-04 | 3.04E-02 |
| HCER(18:0)       | 0.01 (0)    | 0.01 (0)     | 0.01 (0.01)  | 9.47E-04 | 7.78E-03 | 6.66E-02 | 9.65E-05 | 2.06E-02 |
| TAG(54:4_FA20:3) | 0.74 (0.36) | 0.86 (0.55)  | 1.45 (0.91)  | 1.54E-03 | 1.19E-02 | 2.09E-01 | 1.84E-04 | 6.31E-03 |
| PE(18:0_20:3)    | 9.29 (3.63) | 10.36 (5.31) | 16.1 (7.3)   | 6.63E-04 | 5.57E-03 | 2.71E-01 | 9.14E-05 | 2.32E-03 |
| TAG(58:8_FA20:3) | 0.23 (0.11) | 0.25 (0.15)  | 0.45 (0.23)  | 4.82E-04 | 4.10E-03 | 4.07E-01 | 9.89E-05 | 8.48E-04 |
| DAG(18:1_20:3)   | 0.46 (0.2)  | 0.57 (0.36)  | 0.94 (0.55)  | 4.28E-04 | 3.71E-03 | 2.11E-01 | 5.10E-05 | 2.64E-03 |
| TAG(56:4_FA20:3) | 0.21 (0.14) | 0.34 (0.41)  | 0.5 (0.39)   | 4.32E-04 | 3.71E-03 | 2.51E-01 | 5.69E-05 | 1.98E-03 |
| TAG(56:5_FA16:0) | 1.03 (0.58) | 1.21 (0.87)  | 1.83 (0.92)  | 3.38E-04 | 3.03E-03 | 3.14E-01 | 5.33E-05 | 1.11E-03 |
| TAG(56:6_FA20:3) | 4.32 (1.66) | 4.26 (1.8)   | 7.11 (2.77)  | 1.64E-04 | 1.66E-03 | 4.35E-01 | 6.42E-05 | 1.69E-04 |

|                  |             |             |             |          |          |          |          |          |
|------------------|-------------|-------------|-------------|----------|----------|----------|----------|----------|
| DAG(18:1_22:4)   | 0.11 (0.06) | 0.15 (0.12) | 0.25 (0.14) | 3.40E-04 | 3.03E-03 | 1.93E-01 | 3.89E-05 | 2.61E-03 |
| TAG(56:5_FA20:3) | 2.91 (1.38) | 3.13 (1.81) | 5.59 (2.74) | 9.55E-05 | 1.04E-03 | 4.02E-01 | 2.12E-05 | 2.68E-04 |
| TAG(58:7_FA22:4) | 0.32 (0.13) | 0.33 (0.19) | 0.56 (0.2)  | 4.93E-05 | 6.05E-04 | 4.99E-01 | 1.64E-05 | 9.66E-05 |
| CER(20:0)        | 0.01 (0)    | 0.01 (0)    | 0.02 (0.01) | 1.83E-05 | 2.68E-04 | 1.62E-01 | 1.98E-06 | 5.09E-04 |
| MAG(20:3)        | 0.45 (0.31) | 0.82 (1.12) | 1.47 (1.77) | 8.95E-06 | 1.46E-04 | 1.90E-02 | 7.62E-07 | 6.03E-03 |
| CER(22:0)        | 0.08 (0.03) | 0.1 (0.03)  | 0.17 (0.08) | 7.83E-06 | 1.33E-04 | 5.48E-02 | 6.29E-07 | 1.54E-03 |
| DCER(16:0)       | 0.1 (0.04)  | 0.12 (0.06) | 0.27 (0.12) | 4.89E-07 | 1.22E-05 | 7.64E-02 | 4.09E-08 | 1.78E-04 |
| CER(16:0)        | 0.14 (0.05) | 0.18 (0.09) | 0.38 (0.17) | 2.24E-08 | 1.66E-06 | 5.06E-02 | 1.70E-09 | 5.17E-05 |
